# Supplementary material for: Adaptive adhesion systems mediate glioma cell invasion in complex environments
Source: Oxford University Press journal article supplement (doi:10.1242/jcs.216382), 2018-07-10
Supplement: jcs216382supp.pdf [file jcs216382supp.pdf]

**Supplementary Table 1.** List of antibodies used for staining and perturbation of adhesion function of integrins.

| Antigen                   | Species, clonality, labeling | Isotype | Clone name   | Company           | Catalogue number | Application                   | Final concentration $\mu\text{g/ml}$ |
|---------------------------|------------------------------|---------|--------------|-------------------|------------------|-------------------------------|--------------------------------------|
| Human $\alpha 1$ integrin | mouse monoclonal, FITC       | IgG1    | TS2/7        | Abcam             | ab34176          | FACS                          | 10                                   |
| Human $\alpha 2$ integrin | mouse monoclonal, FITC       | IgG1    | AK-7         | BD Biosciences    | 555498           | FACS                          | 5                                    |
| Human $\alpha 3$ integrin | mouse monoclonal             | IgG1    | 17C6         | Bio-Rad           | MCA1948 GA       | FACS                          | 10                                   |
| Human $\alpha 6$ integrin | Rat monoclonal               | IgG2a   | GoH3         | BD Biosciences    | 555734           | FACS                          | 10                                   |
| Human $\alpha V$ integrin | mouse monoclonal             | IgG1    | 272-17E6     | Abcam             | ab16821          | FACS, Adhesion-perturbing     | 10                                   |
| Human $\beta 1$ integrin  | mouse monoclonal             | IgG1    | 4B4          | Bechman Coulter   | 6603113          | FACS, IF, Adhesion-perturbing | 10<br>15                             |
| Human $\beta 3$ integrin  | mouse monoclonal             | IgG1    | Y2/51        | Bio-Rad           | MCA2588 GA       | FACS                          | 10                                   |
| Human $\beta 4$ integrin  | mouse monoclonal             | IgG1    | ASC-3        | Abcam             | ab78267          | FACS                          | 10                                   |
| Human Collagen IV         | Rabbit polyclonal            | IgG1    | –            | Sigma             | PA1-28534        | IF                            | 5                                    |
| Mouse laminin             | Rabbit polyclonal            | IgG     | –            | Sigma             | L9393            | IF                            | 7                                    |
| Human vimentin            | Rabbit monoclonal            | IgG     | SP20         | Thermo Scientific | MA5-14564        | IF                            | 1:250                                |
| Chicken paxillin          | Mouse monoclonal             | IgG1    | 165/Paxillin | BD Biosciences    | 610619           | IF                            | 10                                   |
| Isotype control           | Mouse monoclonal             | IgG1    | MOPC-21      | BD Biosciences    | 555746           | FACS, IF, Adhesion-perturbing | 10<br>10-15                          |
| Isotype control           | Rat monoclonal               | IgG2a   | R35-95       | BD Biosciences    | 553927           | FACS, IF, Adhesion-perturbing | 10                                   |
| Isotype control, FITC     | Mouse monoclonal             | IgG1    | MOPC-21      | BD Biosciences    | 551955           | FACS                          | 10                                   |

**Supplementary Table 2.** Proteins deposited by mouse astrocytes on cell culture dish identified by mass-spectrometry. Details are described in Materials and Methods section.

[Click here to Download Table S2](#)

**Supplementary Table 3.** Proteins deposited by human astrocytes on cell culture dish identified by mass-spectrometry. Details are described in Materials and Methods section.

[Click here to Download Table S3](#)

### Supplementary information

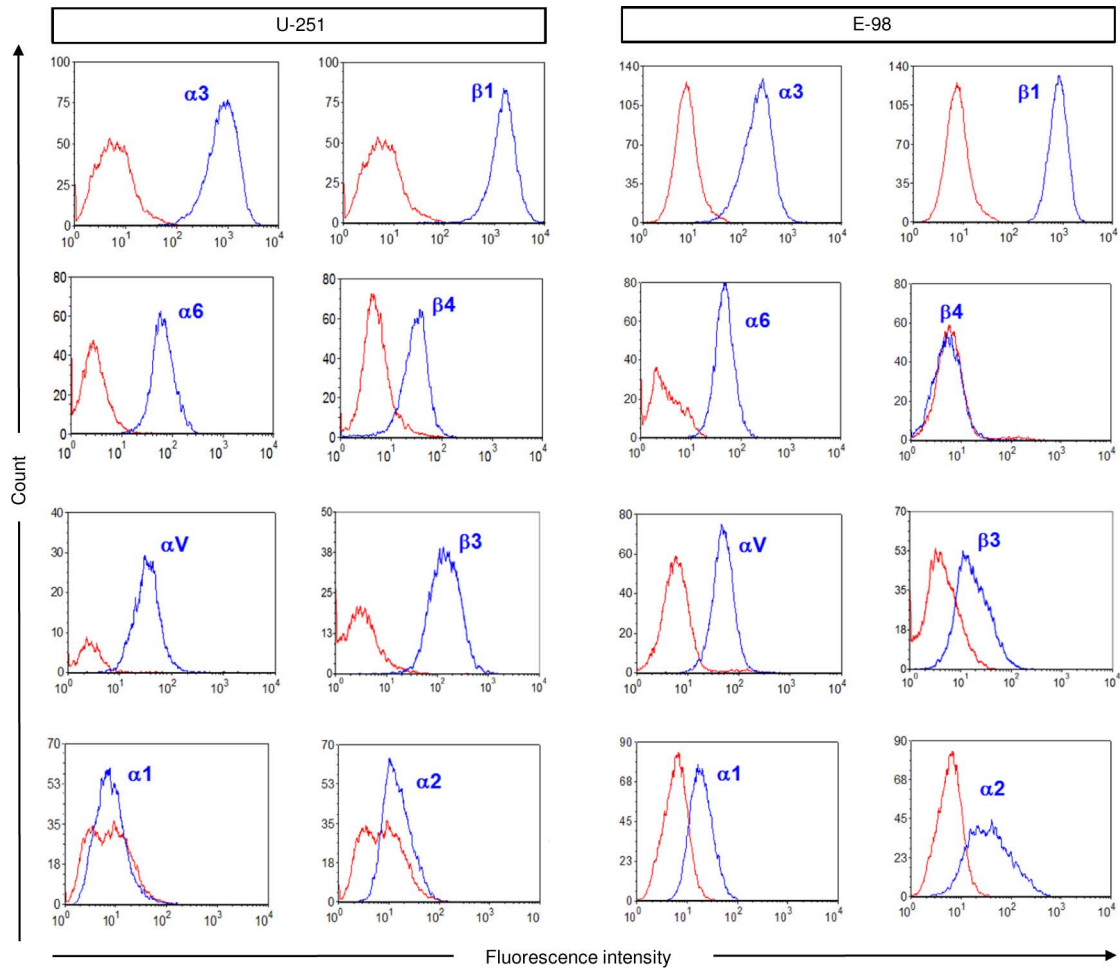

**Fig. S1. Expression of integrin subunits in U-251 and E-98 cells measured with flow cytometry.**

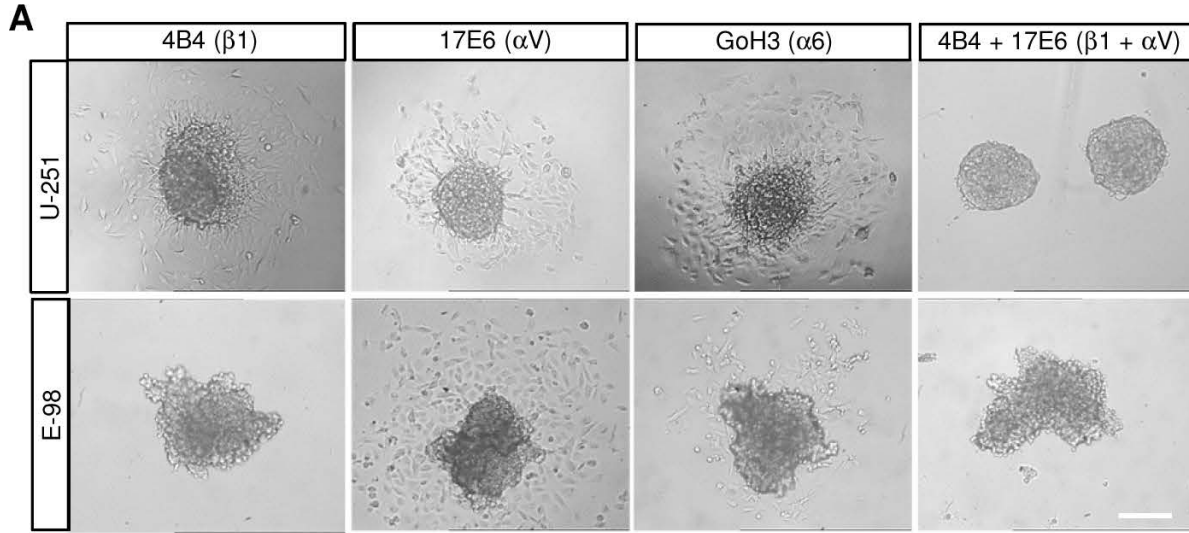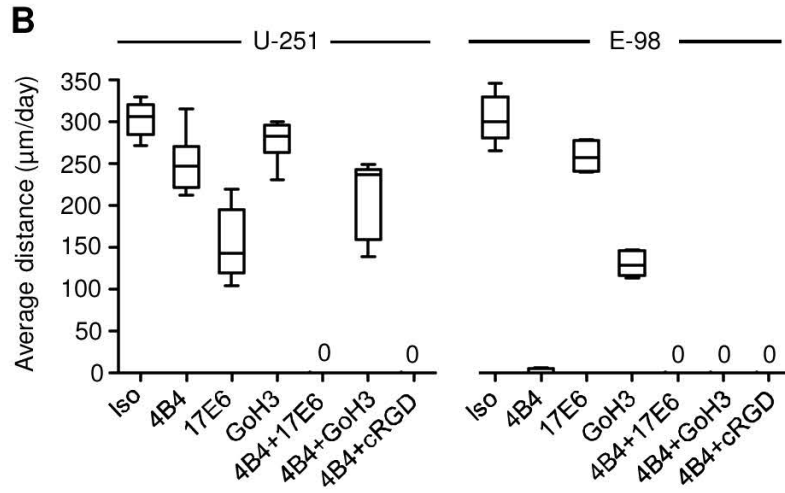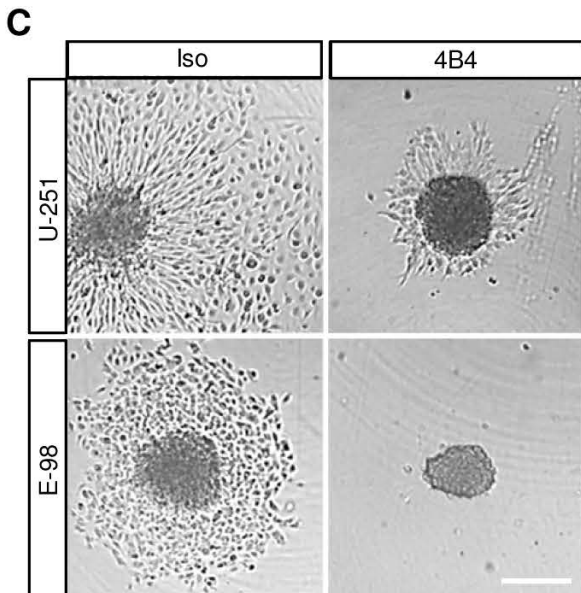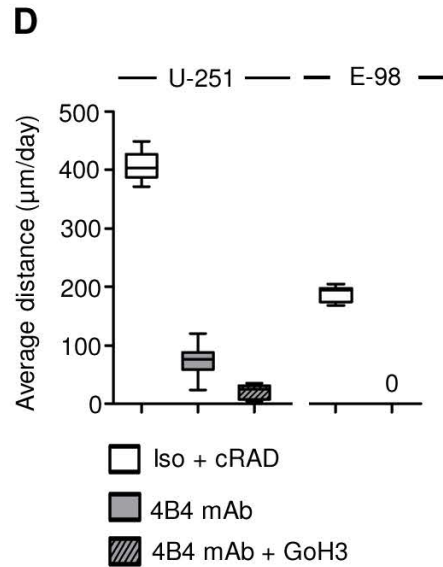

**Fig. S2. Migration of glioma cells on rBM coated surface and in hyaluronan-rBM interface is dependent on  $\beta 1$ ,  $\alpha V$  and  $\alpha 6$  integrin subunits.** (A) Radial migration of U-251 and E-98 cells from spheroids after 24 h on plastic surface coated with rBM molecules (Matrigel) in media with control isotype IgGs or with adhesion-perturbing anti-integrin mAbs 4B4 ( $\beta 1$ ), 17E6 ( $\alpha V$ ), GoH3 ( $\alpha 6$ ) combined with cRGDfV peptide inhibiting RGD-binding integrins ( $\alpha 5$ ,  $\alpha V$ ). (B) Average radial migration distance of U-251 and E-98 cells from the spheroid margin. Data represent 10-13 (U-251) and 10-11 (E-98) spheroids per condition from 2 independent experiments. Values display the median (black line), 25/75 percentiles (boxes) and maximum/minimum (whiskers). (C) Migration of U-251 and E-98 cells from spheroids along hyaluronan-rBM interface in media with control isotype IgGs or with adhesion-perturbing anti  $\beta 1$  integrin mAb 4B4 or anti  $\alpha 6$  mAb GoH3. (D) Average migration distance of U-251 and E-98 cells along hyaluronan-rBM interface after 24 h. Data represent 10-14 (U-251) and 10-11 (E-98) spheroids per condition from 2 independent experiments. Values display the median (black line), 25/75 percentiles (boxes) and maximum/minimum (whiskers). Scale bars, 200  $\mu\text{m}$ .

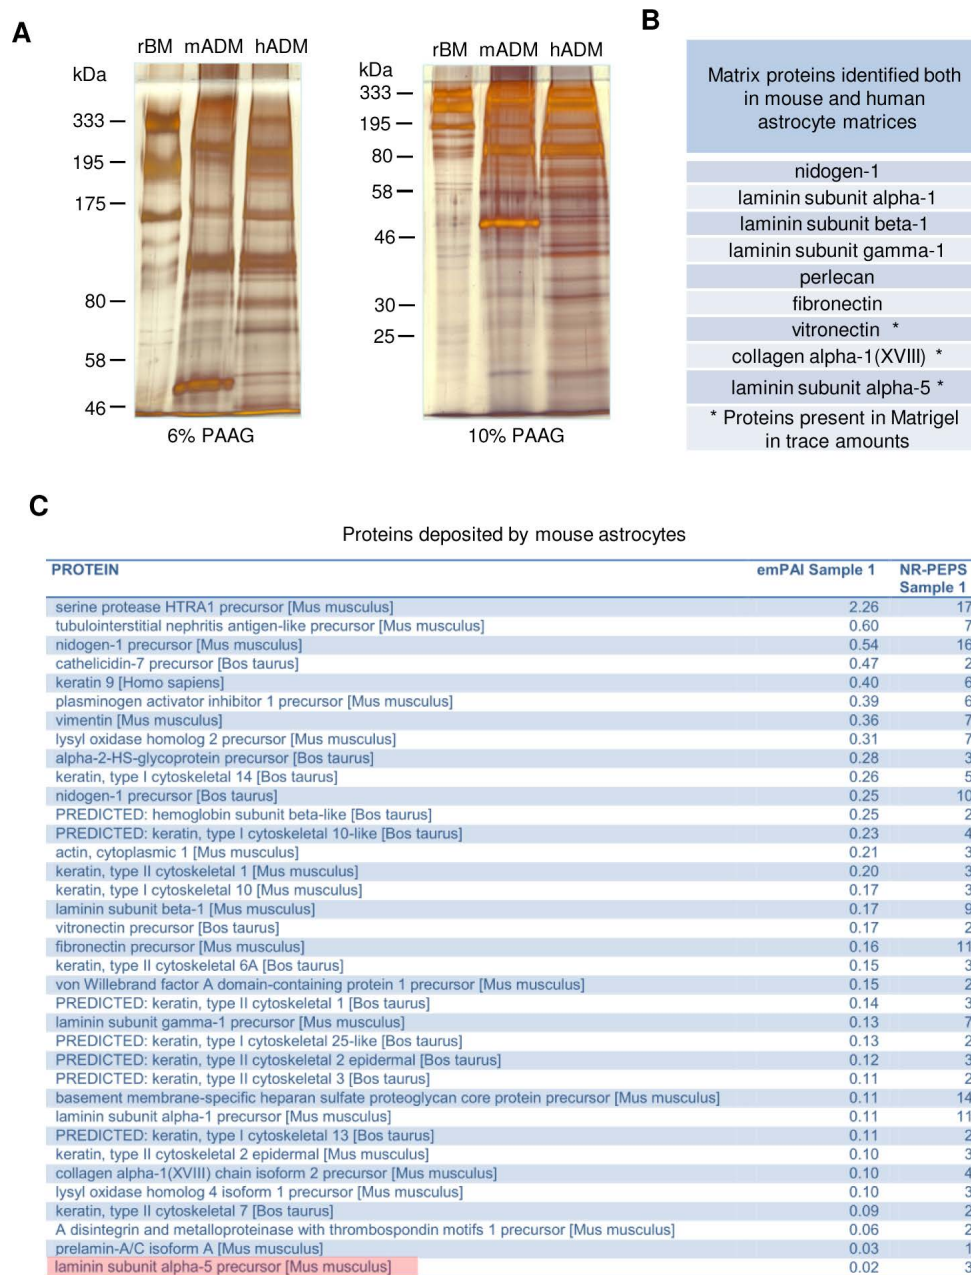

**Fig. S3. Differences in protein composition of astrocyte-deposited matrix and rBM.** (A) PAAG electrophoresis (in 6% and 10% gels) of rBM, mouse (mADM) and human (hADM) astrocyte deposited matrices (silver staining). (B) Matrix proteins identified both in mouse and human astrocyte matrix and low-abundance proteins in growth factor reduced rBM (Matrigel) based on published mass-spectrometry data (Hughes et al., 2010). (C) Proteins identified by mass-spectrometry in mouse astrocyte-deposited matrix.

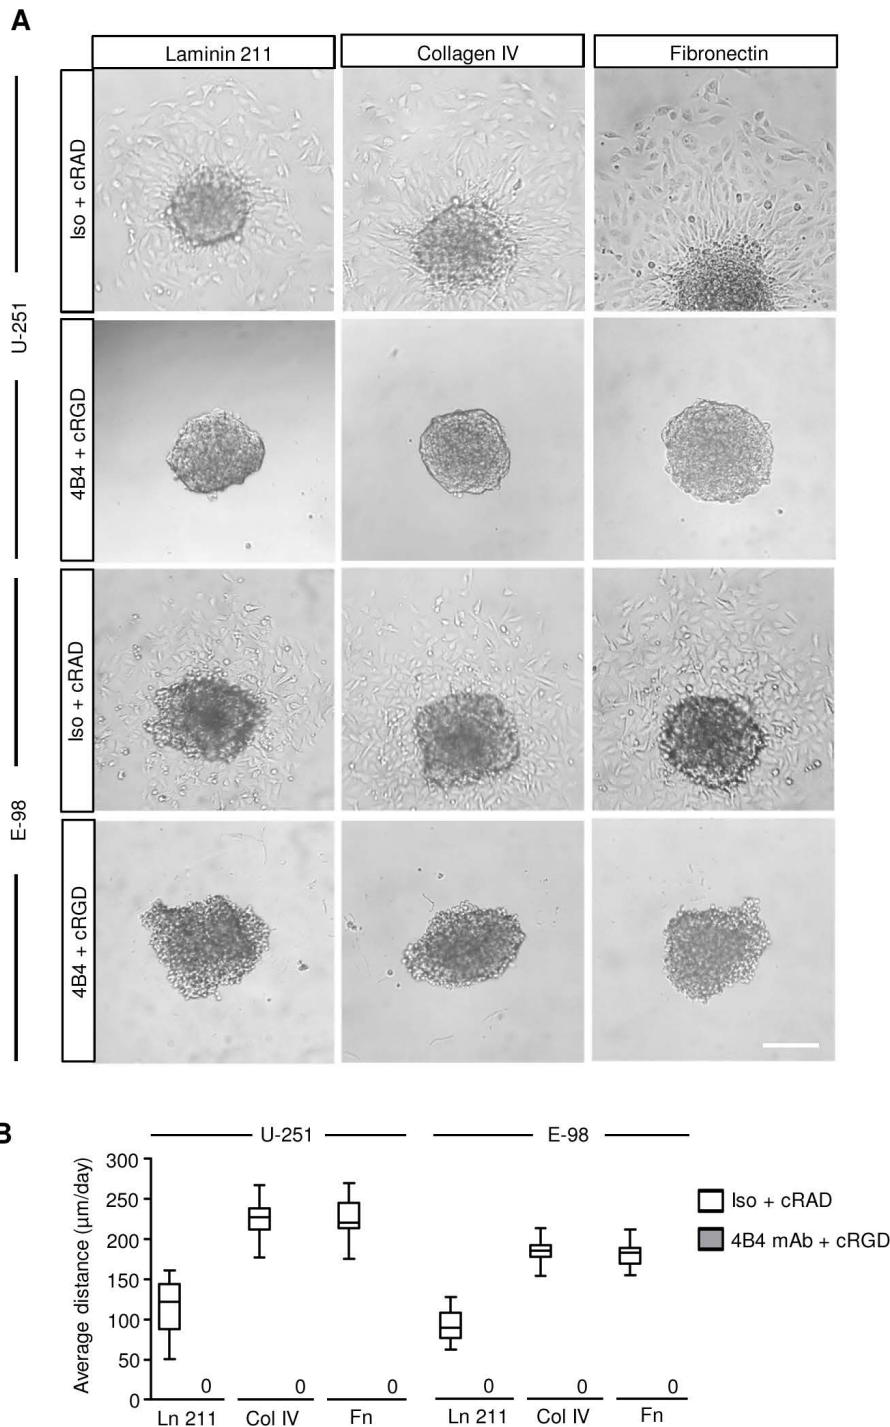

**Fig. S4. Migration of glioma cells on laminin 211, collagen IV or fibronectin coated surface is dependent on  $\beta 1$  and  $\alpha V$  integrin subunits.** (A) Radial migration of U-251 and E-98 cells from spheroids after 24 h on plastic surface coated with the indicated matrix molecules. Isotypic IgG1 and control cRADfV peptide or adhesion-perturbing anti- $\beta 1$  integrin 4B4 mAb combined with cRGDfV peptide inhibiting RGD-binding integrins ( $\alpha 5$ ,  $\alpha V$ ) were added to the culture media. (B) Average migration distance of U-251 and E-98 cells on plastic surface coated with the indicated matrix molecules. Data represent 11-24 (U-251) and 16-25 (E-98) spheroids per condition from 2 independent experiments. Values display the median (black line), 25/75 percentiles (boxes) and maximum/minimum (whiskers). Scale bars, 200  $\mu\text{m}$ .

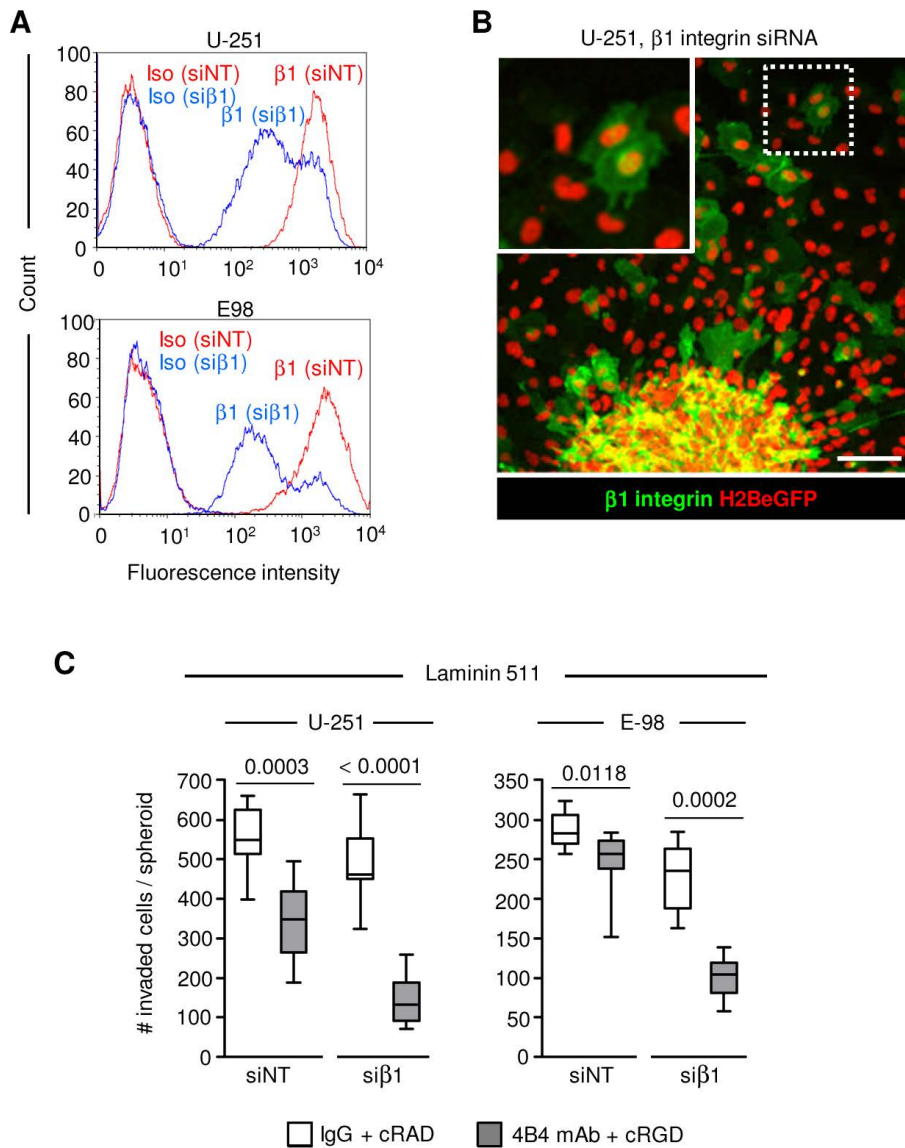

**Fig. S5. β1 integrin subunits mediate glioma cell migration on laminin 511.**

Expression of β1 integrin in U-251 and E-98 cells 3 days after their transfection with either non-targeting (NT) or β1 integrin siRNA based on flow cytometry (A) or confocal microscopy on laminin 511 coated culture surface (B). Red nuclei, all cells; green fluorescence, cells retaining β1 integrin expression despite siRNA treatment. (C) Number of migrated U-251 and E-98 cells per spheroid after transfection with NT or anti-β1 integrin siRNAs from spheroids on laminin 511 coated culture surface (24 h), in media with isotypic IgG1 and control cRADfV peptide or adhesion-perturbing anti β1 integrin 4B4 mAb combined with cRGDfV peptide (related to Fig. 5B). Data represent 16-32 (U-251) and 15-24 (E-98) spheroids per condition from 3 independent siRNA transfections. Values display the median (black line), 25/75 percentiles (boxes) and maximum/minimum (whiskers). P-values shown were obtained using the Mann-Whitney test. Scale bar, 100 μm.



References.

**Hughes, C. S., Postovit, L. M. and Lajoie, G. A.** (2010). Matrigel : A complex protein mixture required for optimal growth of cell culture. *Proteomics* **10**, 1886–1890.
